# Supplementary material for: Characterization of Virulent T4-Like Acinetobacter baumannii Bacteriophages DLP1 and DLP2
Source: MDPI journal article supplement (doi:10.3390/v15030739), 2023-03-13
Supplement: s1 [file s1]

# Phyre2

|               |                                                                     |
|---------------|---------------------------------------------------------------------|
| Email         | dlpeters@ualberta.ca                                                |
| Description   | SB1 - ADLP1_008_translation_Acinetobacter_phage_SB1_complete_genome |
| Date          | Fri Jan 6 04:30:02 GMT 2023                                         |
| Unique Job ID | 8f19ade380738c76                                                    |

Detailed template information

| #  | Template                | Alignment Coverage                                                                            | 3D Model                                                                            | Confidence | % i.d. | Template Information                                                                                                                                                                                                                                                                                                                                |
|----|-------------------------|-----------------------------------------------------------------------------------------------|-------------------------------------------------------------------------------------|------------|--------|-----------------------------------------------------------------------------------------------------------------------------------------------------------------------------------------------------------------------------------------------------------------------------------------------------------------------------------------------------|
| 1  | <a href="#">d1s7ba_</a> | 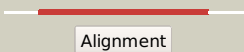 Alignment   |    | 100.0      | 32     | <b>Fold:</b> Multidrug resistance efflux transporter EmrE<br><b>Superfamily:</b> Multidrug resistance efflux transporter EmrE<br><b>Family:</b> Multidrug resistance efflux transporter EmrE<br><b>PDB entry:</b> <a href="#">PDBe</a> <a href="#">RCSB</a> <a href="#">PDBj</a>                                                                    |
| 2  | <a href="#">c2i68B_</a> |  Alignment   |    | 99.9       | 32     | <b>PDB header:</b> transport protein<br><b>Chain:</b> B: <b>PDB Molecule:</b> protein emre;<br><b>PDBTitle:</b> cryo-em based theoretical model structure of transmembrane2 domain of the multidrug-resistance antiporter from e. coli3 emre<br><b>PDB Entry:</b> <a href="#">PDBe</a> <a href="#">RCSB</a> <a href="#">PDBj</a>                    |
| 3  | <a href="#">c6wk9B_</a> |  Alignment   |    | 100.0      | 22     | <b>PDB header:</b> transport protein<br><b>Chain:</b> B: <b>PDB Molecule:</b> multidrug resistance protein, smr family;<br><b>PDBTitle:</b> crystal structure of gdx-clo from small multidrug resistance family of2 transporters in complex with octylguanidium<br><b>PDB Entry:</b> <a href="#">PDBe</a> <a href="#">RCSB</a> <a href="#">PDBj</a> |
| 4  | <a href="#">c7pafA_</a> |  Alignment   |   | 97.8       | 15     | <b>PDB header:</b> transport protein<br><b>Chain:</b> A: <b>PDB Molecule:</b> licb protein;<br><b>PDBTitle:</b> streptococcus pneumoniae choline importer licb in lipid nanodiscs<br><b>PDB Entry:</b> <a href="#">PDBe</a> <a href="#">RCSB</a> <a href="#">PDBj</a>                                                                               |
| 5  | <a href="#">c6ukjA_</a> |  Alignment |  | 97.7       | 15     | <b>PDB header:</b> membrane protein<br><b>Chain:</b> A: <b>PDB Molecule:</b> chloroquine resistance transporter;<br><b>PDBTitle:</b> single-particle cryo-em structure of plasmodium falciparum chloroquine2 resistance transporter (pfcr1) 7g8 isoform<br><b>PDB Entry:</b> <a href="#">PDBe</a> <a href="#">RCSB</a> <a href="#">PDBj</a>         |
| 6  | <a href="#">c5i20E_</a> |  Alignment |  | 98.2       | 14     | <b>PDB header:</b> membrane protein<br><b>Chain:</b> E: <b>PDB Molecule:</b> uncharacterized protein;<br><b>PDBTitle:</b> crystal structure of protein<br><b>PDB Entry:</b> <a href="#">PDBe</a> <a href="#">RCSB</a> <a href="#">PDBj</a>                                                                                                          |
| 7  | <a href="#">c5y79A_</a> |  Alignment |  | 97.9       | 13     | <b>PDB header:</b> transport protein<br><b>Chain:</b> A: <b>PDB Molecule:</b> putative hexose phosphate translocator;<br><b>PDBTitle:</b> crystal structure of the triose-phosphate/phosphate translocator in2 complex with 3-phosphoglycerate<br><b>PDB Entry:</b> <a href="#">PDBe</a> <a href="#">RCSB</a> <a href="#">PDBj</a>                  |
| 8  | <a href="#">c5ogeE_</a> |  Alignment |  | 97.8       | 12     | <b>PDB header:</b> membrane protein<br><b>Chain:</b> E: <b>PDB Molecule:</b> gdp-mannose transporter 1;<br><b>PDBTitle:</b> crystal structure of a nucleotide sugar transporter<br><b>PDB Entry:</b> <a href="#">PDBe</a> <a href="#">RCSB</a> <a href="#">PDBj</a>                                                                                 |
| 9  | <a href="#">c5i20C_</a> |  Alignment |  | 97.8       | 11     | <b>PDB header:</b> membrane protein<br><b>Chain:</b> C: <b>PDB Molecule:</b> uncharacterized protein;<br><b>PDBTitle:</b> crystal structure of protein<br><b>PDB Entry:</b> <a href="#">PDBe</a> <a href="#">RCSB</a> <a href="#">PDBj</a>                                                                                                          |
| 10 | <a href="#">c6i1rA_</a> |  Alignment |  | 98.1       | 10     | <b>PDB header:</b> membrane protein<br><b>Chain:</b> A: <b>PDB Molecule:</b> cmp-sialic acid transporter 1;<br><b>PDBTitle:</b> crystal structure of cmp bound cst in an outward facing conformation<br><b>PDB Entry:</b> <a href="#">PDBe</a> <a href="#">RCSB</a> <a href="#">PDBj</a>                                                            |
| 11 | <a href="#">c6oh2A_</a> |  Alignment |  | 98.2       | 7      | <b>PDB header:</b> transport protein<br><b>Chain:</b> A: <b>PDB Molecule:</b> cmp-sialic acid transporter;<br><b>PDBTitle:</b> x-ray crystal structure of the mouse cmp-sialic acid transporter in2 complex with cmp, by lipidic cubic phase<br><b>PDB Entry:</b> <a href="#">PDBe</a> <a href="#">RCSB</a> <a href="#">PDBj</a>                    |

|    |                         |           |                                                                                     |      |    |                                                                                                                                                                                                                                                                                                                                                                                                           |
|----|-------------------------|-----------|-------------------------------------------------------------------------------------|------|----|-----------------------------------------------------------------------------------------------------------------------------------------------------------------------------------------------------------------------------------------------------------------------------------------------------------------------------------------------------------------------------------------------------------|
| 12 | <a href="#">c6l85A_</a> | Alignment |    | 18.5 | 7  | <b>PDB header:</b> membrane protein<br><b>Chain:</b> A; <b>PDB Molecule:</b> phosphate transporter;<br><b>PDBTitle:</b> the sodium-dependent phosphate transporter<br><b>PDB Entry:</b> <a href="#">PDBe</a> <a href="#">RCSB</a> <a href="#">PDBj</a>                                                                                                                                                    |
| 13 | <a href="#">c4oo9A_</a> | Alignment |    | 16.1 | 26 | <b>PDB header:</b> membrane protein<br><b>Chain:</b> A; <b>PDB Molecule:</b> metabotropic glutamate receptor 5, lysozyme, metabotropic<br><b>PDBTitle:</b> structure of the human class c gpcr metabotropic glutamate receptor 52 transmembrane domain in complex with the negative allosteric3 modulator mavoglurant<br><b>PDB Entry:</b> <a href="#">PDBe</a> <a href="#">RCSB</a> <a href="#">PDBj</a> |
| 14 | <a href="#">c6rfsX_</a> | Alignment |    | 15.9 | 21 | <b>PDB header:</b> oxidoreductase<br><b>Chain:</b> X; <b>PDB Molecule:</b> subunit nuxm of nadh:ubiquinone oxidoreductase (complex i);<br><b>PDBTitle:</b> cryo-em structure of a respiratory complex i mutant lacking ndufs4<br><b>PDB Entry:</b> <a href="#">PDBe</a> <a href="#">RCSB</a> <a href="#">PDBj</a>                                                                                         |
| 15 | <a href="#">c6yp7j_</a> | Alignment |    | 9.4  | 7  | <b>PDB header:</b> photosynthesis<br><b>Chain:</b> J; <b>PDB Molecule:</b> photosystem ii reaction center protein j;<br><b>PDBTitle:</b> psii-lhcii c2s2 supercomplex from pismus sativum grown in high light2 conditions<br><b>PDB Entry:</b> <a href="#">PDBe</a> <a href="#">RCSB</a> <a href="#">PDBj</a>                                                                                             |
| 16 | <a href="#">c6yp7j_</a> | Alignment |    | 9.4  | 7  | <b>PDB header:</b> photosynthesis<br><b>Chain:</b> J; <b>PDB Molecule:</b> photosystem ii reaction center protein j;<br><b>PDBTitle:</b> psii-lhcii c2s2 supercomplex from pismus sativum grown in high light2 conditions<br><b>PDB Entry:</b> <a href="#">PDBe</a> <a href="#">RCSB</a> <a href="#">PDBj</a>                                                                                             |
| 17 | <a href="#">c5xnmj_</a> | Alignment |   | 9.3  | 7  | <b>PDB header:</b> membrane protein<br><b>Chain:</b> J; <b>PDB Molecule:</b> photosystem ii reaction center protein j;<br><b>PDBTitle:</b> structure of unstacked c2s2m2-type psii-lhcii supercomplex from pismus2 sativum<br><b>PDB Entry:</b> <a href="#">PDBe</a> <a href="#">RCSB</a> <a href="#">PDBj</a>                                                                                            |
| 18 | <a href="#">c7dtvA_</a> | Alignment |  | 9.2  | 20 | <b>PDB header:</b> membrane protein<br><b>Chain:</b> A; <b>PDB Molecule:</b> extracellular calcium-sensing receptor;<br><b>PDBTitle:</b> human calcium-sensing receptor bound with l-trp and calcium ions<br><b>PDB Entry:</b> <a href="#">PDBe</a> <a href="#">RCSB</a> <a href="#">PDBj</a>                                                                                                             |
| 19 | <a href="#">c3jcu_</a>  | Alignment |  | 8.6  | 7  | <b>PDB header:</b> membrane protein<br><b>Chain:</b> J; <b>PDB Molecule:</b> photosystem ii reaction center protein j;<br><b>PDBTitle:</b> cryo-em structure of spinach psii-lhcii supercomplex at 3.2 angstrom2 resolution<br><b>PDB Entry:</b> <a href="#">PDBe</a> <a href="#">RCSB</a> <a href="#">PDBj</a>                                                                                           |
| 20 | <a href="#">c7shfB_</a> | Alignment |  | 8.0  | 3  | <b>PDB header:</b> signaling protein<br><b>Chain:</b> B; <b>PDB Molecule:</b> g-protein coupled receptor 158;<br><b>PDBTitle:</b> cryo-em structure of gpr158 coupled to the rgs7-gbeta5 complex<br><b>PDB Entry:</b> <a href="#">PDBe</a> <a href="#">RCSB</a> <a href="#">PDBj</a>                                                                                                                      |
| 21 | <a href="#">c2lp1A_</a> | Alignment | not modelled                                                                        | 7.1  | 8  | <b>PDB header:</b> membrane protein<br><b>Chain:</b> A; <b>PDB Molecule:</b> c99;<br><b>PDBTitle:</b> the solution nmr structure of the transmembrane c-terminal domain of2 the amyloid precursor protein (c99)<br><b>PDB Entry:</b> <a href="#">PDBe</a> <a href="#">RCSB</a> <a href="#">PDBj</a>                                                                                                       |
| 22 | <a href="#">c7vcfK_</a> | Alignment | not modelled                                                                        | 6.6  | 18 | <b>PDB header:</b> translocase<br><b>Chain:</b> K; <b>PDB Molecule:</b> toc10;<br><b>PDBTitle:</b> cryo-em structure of chlamydomonas toc-tic supercomplex<br><b>PDB Entry:</b> <a href="#">PDBe</a> <a href="#">RCSB</a> <a href="#">PDBj</a>                                                                                                                                                            |
| 23 | <a href="#">c5ir6C_</a> | Alignment | not modelled                                                                        | 6.6  | 17 | <b>PDB header:</b> oxidoreductase<br><b>Chain:</b> C; <b>PDB Molecule:</b> putative membrane protein;<br><b>PDBTitle:</b> the structure of bd oxidase from geobacillus thermodenitrificans<br><b>PDB Entry:</b> <a href="#">PDBe</a> <a href="#">RCSB</a> <a href="#">PDBj</a>                                                                                                                            |
| 24 | <a href="#">c5dogC_</a> | Alignment | not modelled                                                                        | 6.6  | 17 | <b>PDB header:</b> oxidoreductase<br><b>Chain:</b> C; <b>PDB Molecule:</b> putative membrane protein;<br><b>PDBTitle:</b> the structure of bd oxidase from geobacillus thermodenitrificans<br><b>PDB Entry:</b> <a href="#">PDBe</a> <a href="#">RCSB</a> <a href="#">PDBj</a>                                                                                                                            |
| 25 | <a href="#">c3mp7B_</a> | Alignment | not modelled                                                                        | 6.6  | 29 | <b>PDB header:</b> protein transport<br><b>Chain:</b> B; <b>PDB Molecule:</b> preprotein translocase subunit sece;<br><b>PDBTitle:</b> lateral opening of a translocon upon entry of protein suggests the2 mechanism of insertion into membranes<br><b>PDB Entry:</b> <a href="#">PDBe</a> <a href="#">RCSB</a> <a href="#">PDBj</a>                                                                      |
| 26 | <a href="#">c6thkA_</a> | Alignment | not modelled                                                                        | 5.8  | 15 | <b>PDB header:</b> antimicrobial protein<br><b>Chain:</b> A; <b>PDB Molecule:</b> pyocin s5;<br><b>PDBTitle:</b> structural mechanism of pyocin s5 import into pseudomonas aeruginosa<br><b>PDB Entry:</b> <a href="#">PDBe</a> <a href="#">RCSB</a> <a href="#">PDBj</a>                                                                                                                                 |
|    |                         |           |                                                                                     |      |    | <b>PDB header:</b> photosynthesis<br><b>Chain:</b> J; <b>PDB Molecule:</b> photosystem ii reaction center protein j;                                                                                                                                                                                                                                                                                      |

|    |                         |           |              |     |    |                                                                                                                                                                                                                                                                                            |
|----|-------------------------|-----------|--------------|-----|----|--------------------------------------------------------------------------------------------------------------------------------------------------------------------------------------------------------------------------------------------------------------------------------------------|
| 27 | <a href="#">c7rcvj_</a> | Alignment | not modelled | 5.7 | 21 | <b>PDBTitle:</b> high-resolution structure of photosystem ii from the mesophilic2 cyanobacterium, synechocystis sp. pcc 6803<br><b>PDB Entry:</b> <a href="#">PDBe</a> <a href="#">RCSB</a> <a href="#">PDBj</a>                                                                           |
| 28 | <a href="#">d2axtj1</a> | Alignment | not modelled | 5.6 | 7  | <b>Fold:</b> Single transmembrane helix<br><b>Superfamily:</b> Photosystem II reaction center protein J, Psbj<br><b>Family:</b> Psbj-like<br><b>PDB entry:</b> <a href="#">PDBe</a> <a href="#">RCSB</a> <a href="#">PDBj</a>                                                              |
| 29 | <a href="#">c3a0hj_</a> | Alignment | not modelled | 5.6 | 7  | <b>PDB header:</b> electron transport<br><b>Chain:</b> J; <b>PDB Molecule:</b> photosystem ii reaction center protein j;<br><b>PDBTitle:</b> crystal structure of i-substituted photosystem ii complex<br><b>PDB Entry:</b> <a href="#">PDBe</a> <a href="#">RCSB</a> <a href="#">PDBj</a> |
