# Supplementary material for: Characterization of Virulent T4-Like Acinetobacter baumannii Bacteriophages DLP1 and DLP2
Source: MDPI journal article supplement (doi:10.3390/v15030739), 2023-03-13
Supplement: s1 [file s1]

# Phyre2

|               |                                                              |
|---------------|--------------------------------------------------------------|
| Email         | dlpeters@ualberta.ca                                         |
| Description   | vB_AbaM_DLP2_<br>dihydrofolate_reductase_Protein_translation |
| Date          | Fri Jan 6 04:30:02 GMT 2023                                  |
| Unique Job ID | 51e1d1a5d42d34f8                                             |

Detailed template information

| #  | Template                | Alignment Coverage                                                                               | 3D Model                                                                            | Confidence | % i.d. | Template Information                                                                                                                                                                                                                                                                                                                                                       |
|----|-------------------------|--------------------------------------------------------------------------------------------------|-------------------------------------------------------------------------------------|------------|--------|----------------------------------------------------------------------------------------------------------------------------------------------------------------------------------------------------------------------------------------------------------------------------------------------------------------------------------------------------------------------------|
| 1  | <a href="#">d1juva_</a> | <br>Alignment   |    | 100.0      | 45     | <b>Fold:</b> Dihydrofolate reductase-like<br><b>Superfamily:</b> Dihydrofolate reductase-like<br><b>Family:</b> Dihydrofolate reductases<br><b>PDB entry:</b> <a href="#">PDBe</a> <a href="#">RCSB</a> <a href="#">PDBj</a>                                                                                                                                               |
| 2  | <a href="#">d2fzia1</a> | <br>Alignment   |    | 100.0      | 26     | <b>Fold:</b> Dihydrofolate reductase-like<br><b>Superfamily:</b> Dihydrofolate reductase-like<br><b>Family:</b> Dihydrofolate reductases<br><b>PDB entry:</b> <a href="#">PDBe</a> <a href="#">RCSB</a> <a href="#">PDBj</a>                                                                                                                                               |
| 3  | <a href="#">d1df7a_</a> | <br>Alignment   |    | 100.0      | 35     | <b>Fold:</b> Dihydrofolate reductase-like<br><b>Superfamily:</b> Dihydrofolate reductase-like<br><b>Family:</b> Dihydrofolate reductases<br><b>PDB entry:</b> <a href="#">PDBe</a> <a href="#">RCSB</a> <a href="#">PDBj</a>                                                                                                                                               |
| 4  | <a href="#">c3vc0A_</a> | <br>Alignment   |   | 100.0      | 28     | <b>PDB header:</b> oxidoreductase<br><b>Chain:</b> A: <b>PDB Molecule:</b> dihydrofolate reductase;<br><b>PDBTitle:</b> schistosoma mansonii dihydrofolate reductase<br><b>PDB Entry:</b> <a href="#">PDBe</a> <a href="#">RCSB</a> <a href="#">PDBj</a>                                                                                                                   |
| 5  | <a href="#">d8dfra_</a> | <br>Alignment |  | 100.0      | 26     | <b>Fold:</b> Dihydrofolate reductase-like<br><b>Superfamily:</b> Dihydrofolate reductase-like<br><b>Family:</b> Dihydrofolate reductases<br><b>PDB entry:</b> <a href="#">PDBe</a> <a href="#">RCSB</a> <a href="#">PDBj</a>                                                                                                                                               |
| 6  | <a href="#">c7k6cD_</a> | <br>Alignment |  | 100.0      | 33     | <b>PDB header:</b> oxidoreductase/oxidoreductase inhibitor<br><b>Chain:</b> D: <b>PDB Molecule:</b> dihydrofolate reductase;<br><b>PDBTitle:</b> crystal structure of dihydrofolate reductase (dhfr) from mycobacterium2 abscessus atcc 19977 / dsm 44196 with nadp and inhibitor p218<br><b>PDB Entry:</b> <a href="#">PDBe</a> <a href="#">RCSB</a> <a href="#">PDBj</a> |
| 7  | <a href="#">d1ra9a_</a> | <br>Alignment |  | 100.0      | 27     | <b>Fold:</b> Dihydrofolate reductase-like<br><b>Superfamily:</b> Dihydrofolate reductase-like<br><b>Family:</b> Dihydrofolate reductases<br><b>PDB entry:</b> <a href="#">PDBe</a> <a href="#">RCSB</a> <a href="#">PDBj</a>                                                                                                                                               |
| 8  | <a href="#">d1j3ka_</a> | <br>Alignment |  | 100.0      | 27     | <b>Fold:</b> Dihydrofolate reductase-like<br><b>Superfamily:</b> Dihydrofolate reductase-like<br><b>Family:</b> Dihydrofolate reductases<br><b>PDB entry:</b> <a href="#">PDBe</a> <a href="#">RCSB</a> <a href="#">PDBj</a>                                                                                                                                               |
| 9  | <a href="#">c6cxmA_</a> | <br>Alignment |  | 100.0      | 29     | <b>PDB header:</b> oxidoreductase/inhibitor<br><b>Chain:</b> A: <b>PDB Molecule:</b> dihydrofolate reductase;<br><b>PDBTitle:</b> crystal structure of a dihydrofolate reductase from mycobacterium2 smegmatis in complex with nadp and p218<br><b>PDB Entry:</b> <a href="#">PDBe</a> <a href="#">RCSB</a> <a href="#">PDBj</a>                                           |
| 10 | <a href="#">c3tq8A_</a> | <br>Alignment |  | 100.0      | 26     | <b>PDB header:</b> oxidoreductase/oxidoreductase inhibitor<br><b>Chain:</b> A: <b>PDB Molecule:</b> dihydrofolate reductase;<br><b>PDBTitle:</b> structure of the dihydrofolate reductase (folA) from coxiella burnetii2 in complex with trimethoprim<br><b>PDB Entry:</b> <a href="#">PDBe</a> <a href="#">RCSB</a> <a href="#">PDBj</a>                                  |
| 11 | <a href="#">c1zdrB_</a> | <br>Alignment |  | 100.0      | 26     | <b>PDB header:</b> oxidoreductase<br><b>Chain:</b> B: <b>PDB Molecule:</b> dihydrofolate reductase;<br><b>PDBTitle:</b> dhfr from bacillus stearothermophilus<br><b>PDB Entry:</b> <a href="#">PDBe</a> <a href="#">RCSB</a> <a href="#">PDBj</a>                                                                                                                          |
|    |                         |                                                                                                  |                                                                                     |            |        | <b>PDB header:</b> oxidoreductase, transferase                                                                                                                                                                                                                                                                                                                             |

|    |                         |           |                                                                                     |       |    |                                                                                                                                                                                                                                                                                                                                                                                                    |
|----|-------------------------|-----------|-------------------------------------------------------------------------------------|-------|----|----------------------------------------------------------------------------------------------------------------------------------------------------------------------------------------------------------------------------------------------------------------------------------------------------------------------------------------------------------------------------------------------------|
| 12 | <a href="#">c3dg8B_</a> | Alignment |     | 100.0 | 26 | <b>Chain:</b> B: <b>PDB Molecule:</b> bifunctional dihydrofolate reductase-thymidylate synthase;<br><b>PDBTitle:</b> quadruple mutant (n51i+c59r+s108n+i164l) plasmodium falciparum2 dihydrofolate reductase-thymidylate synthase (pfdhfr-ts) complexed3 with rjf670, nadph, and dump<br><b>PDB Entry:</b> <a href="#">PDBe</a> <a href="#">RCSB</a> <a href="#">PDBj</a>                          |
| 13 | <a href="#">c3cseA_</a> | Alignment |    | 100.0 | 25 | <b>PDB header:</b> oxidoreductase<br><b>Chain:</b> A: <b>PDB Molecule:</b> dihydrofolate reductase;<br><b>PDBTitle:</b> candida glabrata dihydrofolate reductase complexed with nadph and 2,4-2 diamino-5-(3-(2,5-dimethoxyphenyl)prop-1-ynyl)-6-ethylpyrimidine3 (ucp120b)<br><b>PDB Entry:</b> <a href="#">PDBe</a> <a href="#">RCSB</a> <a href="#">PDBj</a>                                    |
| 14 | <a href="#">c4m7vA_</a> | Alignment |    | 100.0 | 25 | <b>PDB header:</b> oxidoreductase<br><b>Chain:</b> A: <b>PDB Molecule:</b> dihydrofolate reductase;<br><b>PDBTitle:</b> dihydrofolate reductase from enterococcus faecalis complexed with2 nadp(h)and rab-propyl<br><b>PDB Entry:</b> <a href="#">PDBe</a> <a href="#">RCSB</a> <a href="#">PDBj</a>                                                                                               |
| 15 | <a href="#">c6drsA_</a> | Alignment |    | 100.0 | 27 | <b>PDB header:</b> antifungal protein/inhibitor<br><b>Chain:</b> A: <b>PDB Molecule:</b> dihydrofolate reductase, putative;<br><b>PDBTitle:</b> dihydrofolate reductase (dhfr) of aspergillus flavus in complex with a2 small molecule inhibitor<br><b>PDB Entry:</b> <a href="#">PDBe</a> <a href="#">RCSB</a> <a href="#">PDBj</a>                                                               |
| 16 | <a href="#">c3ia5A_</a> | Alignment |    | 100.0 | 25 | <b>PDB header:</b> oxidoreductase<br><b>Chain:</b> A: <b>PDB Molecule:</b> dihydrofolate reductase;<br><b>PDBTitle:</b> moritella profunda dihydrofolate reductase (dhfr)<br><b>PDB Entry:</b> <a href="#">PDBe</a> <a href="#">RCSB</a> <a href="#">PDBj</a>                                                                                                                                      |
| 17 | <a href="#">d1aoea_</a> | Alignment |    | 100.0 | 23 | <b>Fold:</b> Dihydrofolate reductase-like<br><b>Superfamily:</b> Dihydrofolate reductase-like<br><b>Family:</b> Dihydrofolate reductases<br><b>PDB entry:</b> <a href="#">PDBe</a> <a href="#">RCSB</a> <a href="#">PDBj</a>                                                                                                                                                                       |
| 18 | <a href="#">c7rzoA_</a> | Alignment |  | 100.0 | 24 | <b>PDB header:</b> oxidoreductase<br><b>Chain:</b> A: <b>PDB Molecule:</b> dihydrofolate reductase;<br><b>PDBTitle:</b> crystal structure of a dihydrofolate reductase (fofa) from2 stenotrophomonas maltophilia<br><b>PDB Entry:</b> <a href="#">PDBe</a> <a href="#">RCSB</a> <a href="#">PDBj</a>                                                                                               |
| 19 | <a href="#">c3ix9B_</a> | Alignment |  | 100.0 | 24 | <b>PDB header:</b> oxidoreductase<br><b>Chain:</b> B: <b>PDB Molecule:</b> dihydrofolate reductase;<br><b>PDBTitle:</b> crystal structure of streptococcus pneumoniae dihydrofolate reductase2 - sp9 mutant<br><b>PDB Entry:</b> <a href="#">PDBe</a> <a href="#">RCSB</a> <a href="#">PDBj</a>                                                                                                    |
| 20 | <a href="#">c3f0uX_</a> | Alignment |  | 100.0 | 25 | <b>PDB header:</b> oxidoreductase<br><b>Chain:</b> X: <b>PDB Molecule:</b> trimethoprim-sensitive dihydrofolate reductase;<br><b>PDBTitle:</b> staphylococcus aureus f98y mutant dihydrofolate reductase complexed2 with nadph and 2,4-diamino-5-[3-(3-methoxy-5-phenylphenyl)but-1-3 ynyl]-6-methylpyrimidine<br><b>PDB Entry:</b> <a href="#">PDBe</a> <a href="#">RCSB</a> <a href="#">PDBj</a> |
| 21 | <a href="#">c4eckB_</a> | Alignment | not modelled                                                                        | 100.0 | 27 | <b>PDB header:</b> transferase, oxidoreductase<br><b>Chain:</b> B: <b>PDB Molecule:</b> bifunctional dihydrofolate reductase-thymidylate synthase;<br><b>PDBTitle:</b> crystal structure of the toxoplasma gondii ts-dhfr<br><b>PDB Entry:</b> <a href="#">PDBe</a> <a href="#">RCSB</a> <a href="#">PDBj</a>                                                                                      |
| 22 | <a href="#">d1vdra_</a> | Alignment | not modelled                                                                        | 100.0 | 25 | <b>Fold:</b> Dihydrofolate reductase-like<br><b>Superfamily:</b> Dihydrofolate reductase-like<br><b>Family:</b> Dihydrofolate reductases<br><b>PDB entry:</b> <a href="#">PDBe</a> <a href="#">RCSB</a> <a href="#">PDBj</a>                                                                                                                                                                       |
| 23 | <a href="#">c3e0bA_</a> | Alignment | not modelled                                                                        | 100.0 | 24 | <b>PDB header:</b> oxidoreductase<br><b>Chain:</b> A: <b>PDB Molecule:</b> dihydrofolate reductase;<br><b>PDBTitle:</b> bacillus anthracis dihydrofolate reductase complexed with nadph and 2,2 4-diamino-5-(3-(2,5-dimethoxyphenyl)prop-1-ynyl)-6-ethylpyrimidine3 (ucp120b)<br><b>PDB Entry:</b> <a href="#">PDBe</a> <a href="#">RCSB</a> <a href="#">PDBj</a>                                  |
| 24 | <a href="#">c3clbA_</a> | Alignment | not modelled                                                                        | 100.0 | 26 | <b>PDB header:</b> oxidoreductase, transferase<br><b>Chain:</b> A: <b>PDB Molecule:</b> dhfr-ts;<br><b>PDBTitle:</b> structure of bifunctional tcdhfr-ts in complex with tmq<br><b>PDB Entry:</b> <a href="#">PDBe</a> <a href="#">RCSB</a> <a href="#">PDBj</a>                                                                                                                                   |
| 25 | <a href="#">c2oipE_</a> | Alignment | not modelled                                                                        | 100.0 | 27 | <b>PDB header:</b> transferase, oxidoreductase<br><b>Chain:</b> E: <b>PDB Molecule:</b> chain a, crystal structure of dhfr;<br><b>PDBTitle:</b> crystal structure of the s290g active site mutant of ts-dhfr from2 cryptosporidium hominis<br><b>PDB Entry:</b> <a href="#">PDBe</a> <a href="#">RCSB</a> <a href="#">PDBj</a>                                                                     |
| 26 | <a href="#">d1seja1</a> | Alignment | not modelled                                                                        | 100.0 | 27 | <b>Fold:</b> Dihydrofolate reductase-like<br><b>Superfamily:</b> Dihydrofolate reductase-like<br><b>Family:</b> Dihydrofolate reductases<br><b>PDB entry:</b> <a href="#">PDBe</a> <a href="#">RCSB</a> <a href="#">PDBj</a>                                                                                                                                                                       |
| 27 | <a href="#">c8f09A_</a> | Alignment | not modelled                                                                        | 100.0 | 23 | <b>PDB header:</b> oxidoreductase<br><b>Chain:</b> A: <b>PDB Molecule:</b> dihydrofolate reductase;<br><b>PDBTitle:</b> crystal structure of a trimethoprim-resistant dihydrofolate reductase2 (dhfr) enzyme from an uncultured soil bacterium<br><b>PDB Entry:</b> <a href="#">PDBe</a> <a href="#">RCSB</a> <a href="#">PDBj</a><br><b>Fold:</b> Dihydrofolate reductase-like                    |

|    |                         |           |              |       |    |                                                                                                                                                                                                                                                                                                                                                                                                                                             |
|----|-------------------------|-----------|--------------|-------|----|---------------------------------------------------------------------------------------------------------------------------------------------------------------------------------------------------------------------------------------------------------------------------------------------------------------------------------------------------------------------------------------------------------------------------------------------|
| 28 | <a href="#">d1kmva_</a> | Alignment | not modelled | 100.0 | 22 | <b>Superfamily:</b> Dihydrofolate reductase-like<br><b>Family:</b> Dihydrofolate reductases<br><b>PDB entry:</b> <a href="#">PDBe</a> <a href="#">RCSB</a> <a href="#">PDBj</a>                                                                                                                                                                                                                                                             |
| 29 | <a href="#">c3jsuA_</a> | Alignment | not modelled | 100.0 | 22 | <b>PDB header:</b> oxidoreductase, transferase<br><b>Chain:</b> A: <b>PDB Molecule:</b> dihydrofolate reductase-thymidylate synthase;<br><b>PDBTitle:</b> quadruple mutant(n51i+c59r+s108n+i164l) plasmidum falciparum2 dihydrofolate reductase-thymidylate synthase(pfdhfr-ts) complexed3 with qn254, nadph, and dump<br><b>PDB Entry:</b> <a href="#">PDBe</a> <a href="#">RCSB</a> <a href="#">PDBj</a>                                  |
| 30 | <a href="#">c2blcA_</a> | Alignment | not modelled | 100.0 | 23 | <b>PDB header:</b> oxidoreductase<br><b>Chain:</b> A: <b>PDB Molecule:</b> dihydrofolate reductase-thymidylate synthase;<br><b>PDBTitle:</b> sp21 double mutant p. vivax dihydrofolate reductase in complex with2 des-chloropyrimethamine<br><b>PDB Entry:</b> <a href="#">PDBe</a> <a href="#">RCSB</a> <a href="#">PDBj</a>                                                                                                               |
| 31 | <a href="#">c5eccA_</a> | Alignment | not modelled | 100.0 | 25 | <b>PDB header:</b> oxidoreductase/oxidoreductase inhibitor<br><b>Chain:</b> A: <b>PDB Molecule:</b> dehydrofolate reductase type i;<br><b>PDBTitle:</b> klebsiella pneumoniae dfra1 complexed with nadph and 6-ethyl-5-(3-(2-2 methoxy-5-(pyridin-4-yl)phenyl)prop-1-yn-1-yl)pyrimidine-2,4-diamine<br><b>PDB Entry:</b> <a href="#">PDBe</a> <a href="#">RCSB</a> <a href="#">PDBj</a>                                                     |
| 32 | <a href="#">c3rg9A_</a> | Alignment | not modelled | 100.0 | 22 | <b>PDB header:</b> oxidoreductase/oxidoreductase inhibitor<br><b>Chain:</b> A: <b>PDB Molecule:</b> bifunctional dihydrofolate reductase-thymidylate synthase;<br><b>PDBTitle:</b> trypanosoma brucei dihydrofolate reductase (tbdhfr) in complex with2 wr99210<br><b>PDB Entry:</b> <a href="#">PDBe</a> <a href="#">RCSB</a> <a href="#">PDBj</a>                                                                                         |
| 33 | <a href="#">c6rumA_</a> | Alignment | not modelled | 100.0 | 24 | <b>PDB header:</b> protein binding<br><b>Chain:</b> A: <b>PDB Molecule:</b> gfp-lama-g97 a gfp enhancer nanobody with cpdhfr insertion;<br><b>PDBTitle:</b> crystal structure of gfp-lama-g97 - a gfp enhancer nanobody with2 cpdhfr insertion and tmp and nadph<br><b>PDB Entry:</b> <a href="#">PDBe</a> <a href="#">RCSB</a> <a href="#">PDBj</a>                                                                                        |
| 34 | <a href="#">d3dfra_</a> | Alignment | not modelled | 100.0 | 21 | <b>Fold:</b> Dihydrofolate reductase-like<br><b>Superfamily:</b> Dihydrofolate reductase-like<br><b>Family:</b> Dihydrofolate reductases<br><b>PDB entry:</b> <a href="#">PDBe</a> <a href="#">RCSB</a> <a href="#">PDBj</a>                                                                                                                                                                                                                |
| 35 | <a href="#">c3k2hA_</a> | Alignment | not modelled | 100.0 | 23 | <b>PDB header:</b> transferase<br><b>Chain:</b> A: <b>PDB Molecule:</b> dihydrofolate reductase/thymidylate synthase;<br><b>PDBTitle:</b> co-crystal structure of dihydrofolate reductase/thymidylate synthase2 from babesia bovis with dump, pemetrexed and nadp<br><b>PDB Entry:</b> <a href="#">PDBe</a> <a href="#">RCSB</a> <a href="#">PDBj</a>                                                                                       |
| 36 | <a href="#">c7lrhD_</a> | Alignment | not modelled | 98.3  | 18 | <b>PDB header:</b> oxidoreductase<br><b>Chain:</b> D: <b>PDB Molecule:</b> riboflavin biosynthesis protein ribd;<br><b>PDBTitle:</b> c-terminal domain of ribd from brucella abortus (5-amino-6-2 ribosylamino-2,4(1h,3h)-pyrimidinedione 5'-phosphate reductase)<br><b>PDB Entry:</b> <a href="#">PDBe</a> <a href="#">RCSB</a> <a href="#">PDBj</a>                                                                                       |
| 37 | <a href="#">d1d1ga_</a> | Alignment | not modelled | 99.9  | 21 | <b>Fold:</b> Dihydrofolate reductase-like<br><b>Superfamily:</b> Dihydrofolate reductase-like<br><b>Family:</b> Dihydrofolate reductases<br><b>PDB entry:</b> <a href="#">PDBe</a> <a href="#">RCSB</a> <a href="#">PDBj</a>                                                                                                                                                                                                                |
| 38 | <a href="#">c2gd9A_</a> | Alignment | not modelled | 99.5  | 18 | <b>PDB header:</b> oxidoreductase<br><b>Chain:</b> A: <b>PDB Molecule:</b> hypothetical protein yyap;<br><b>PDBTitle:</b> crystal structure of a putative dihydrofolate reductase (bsu40760,2 yyap) from bacillus subtilis at 2.30 a resolution<br><b>PDB Entry:</b> <a href="#">PDBe</a> <a href="#">RCSB</a> <a href="#">PDBj</a>                                                                                                         |
| 39 | <a href="#">c7lrhC_</a> | Alignment | not modelled | 98.3  | 20 | <b>PDB header:</b> oxidoreductase<br><b>Chain:</b> C: <b>PDB Molecule:</b> riboflavin biosynthesis protein ribd;<br><b>PDBTitle:</b> c-terminal domain of ribd from brucella abortus (5-amino-6-2 ribosylamino-2,4(1h,3h)-pyrimidinedione 5'-phosphate reductase)<br><b>PDB Entry:</b> <a href="#">PDBe</a> <a href="#">RCSB</a> <a href="#">PDBj</a>                                                                                       |
| 40 | <a href="#">c2hxvA_</a> | Alignment | not modelled | 98.2  | 17 | <b>PDB header:</b> biosynthetic protein<br><b>Chain:</b> A: <b>PDB Molecule:</b> diaminohydroxyphosphoribosylaminopyrimidine deaminase/ 5-<br><b>PDBTitle:</b> crystal structure of a diaminohydroxyphosphoribosylaminopyrimidine2 deaminase/ 5-amino-6-(5-phosphoribosylamino)uracil reductase (tm1828)3 from thermotoga maritima at 1.80 a resolution<br><b>PDB Entry:</b> <a href="#">PDBe</a> <a href="#">RCSB</a> <a href="#">PDBj</a> |
| 41 | <a href="#">c2p4gA_</a> | Alignment | not modelled | 97.3  | 18 | <b>PDB header:</b> oxidoreductase<br><b>Chain:</b> A: <b>PDB Molecule:</b> hypothetical protein;<br><b>PDBTitle:</b> crystal structure of a pyrimidine reductase-like protein (dip1392)2 from corynebacterium diphtheriae nctc at 2.30 a resolution<br><b>PDB Entry:</b> <a href="#">PDBe</a> <a href="#">RCSB</a> <a href="#">PDBj</a>                                                                                                     |
| 42 | <a href="#">d2hxva1</a> | Alignment | not modelled | 98.3  | 16 | <b>Fold:</b> Dihydrofolate reductase-like<br><b>Superfamily:</b> Dihydrofolate reductase-like<br><b>Family:</b> RibD C-terminal domain-like<br><b>PDB entry:</b> <a href="#">PDBe</a> <a href="#">RCSB</a> <a href="#">PDBj</a>                                                                                                                                                                                                             |
| 43 | <a href="#">c3kgvA_</a> | Alignment | not modelled | 98.4  | 15 | <b>PDB header:</b> oxidoreductase<br><b>Chain:</b> A: <b>PDB Molecule:</b> bifunctional deaminase-reductase domain protein;<br><b>PDBTitle:</b> crystal structure of putative dihydrofolate reductase (yp_001636057.1)2 from chloroflexus aurantiacus j-10-fl at 1.50 a resolution<br><b>PDB Entry:</b> <a href="#">PDBe</a> <a href="#">RCSB</a> <a href="#">PDBj</a>                                                                      |
| 44 | <a href="#">c2xw7A_</a> | Alignment | not modelled | 99.4  | 16 | <b>PDB header:</b> oxidoreductase<br><b>Chain:</b> A: <b>PDB Molecule:</b> dihydrofolate reductase;<br><b>PDBTitle:</b> structure of mycobacterium smegmatis putative reductase ms0308<br><b>PDB Entry:</b> <a href="#">PDBe</a> <a href="#">RCSB</a> <a href="#">PDBj</a>                                                                                                                                                                  |
| 45 | <a href="#">c5xuxC_</a> | Alignment | not modelled | 97.9  | 17 | <b>PDB header:</b> oxidoreductase<br><b>Chain:</b> C: <b>PDB Molecule:</b> conserved protein;<br><b>PDBTitle:</b> crystal structure of rib7 from methanosarcina mazei<br><b>PDB Entry:</b> <a href="#">PDBe</a> <a href="#">RCSB</a> <a href="#">PDBj</a>                                                                                                                                                                                   |
| 46 | <a href="#">c3znpA_</a> | Alignment | not modelled | 98.2  | 13 | <b>PDB header:</b> hydrolase<br><b>Chain:</b> A: <b>PDB Molecule:</b> ribd;                                                                                                                                                                                                                                                                                                                                                                 |

|    |                         |           |              |      |    |                                                                                                                                                                                                                                                                                                                                                                                  |
|----|-------------------------|-----------|--------------|------|----|----------------------------------------------------------------------------------------------------------------------------------------------------------------------------------------------------------------------------------------------------------------------------------------------------------------------------------------------------------------------------------|
| 46 | <a href="#">c2p9A_</a>  | Alignment | not modelled | 98.2 | 13 | <b>PDBTitle:</b> acinetobacter baumannii ribd, form 2<br><b>PDB Entry:</b> <a href="#">PDBe</a> <a href="#">RCSB</a> <a href="#">PDBj</a>                                                                                                                                                                                                                                        |
| 47 | <a href="#">c3jtwB_</a> | Alignment | not modelled | 99.5 | 15 | <b>PDB header:</b> oxidoreductase<br><b>Chain:</b> B: <b>PDB Molecule:</b> dihydrofolate reductase;<br><b>PDBTitle:</b> crystal structure of putative dihydrofolate reductase (yp_805003.1)2 from pediococcus pentosaceus atcc 25745 at 1.90 a resolution<br><b>PDB Entry:</b> <a href="#">PDBe</a> <a href="#">RCSB</a> <a href="#">PDBj</a>                                    |
| 48 | <a href="#">c2o7pA_</a> | Alignment | not modelled | 98.3 | 14 | <b>PDB header:</b> hydrolase, oxidoreductase<br><b>Chain:</b> A: <b>PDB Molecule:</b> riboflavin biosynthesis protein ribd;<br><b>PDBTitle:</b> the crystal structure of ribd from escherichia coli in complex with2 the oxidised nadp+ cofactor in the active site of the reductase3 domain<br><b>PDB Entry:</b> <a href="#">PDBe</a> <a href="#">RCSB</a> <a href="#">PDBj</a> |
| 49 | <a href="#">d2b3za1</a> | Alignment | not modelled | 98.5 | 15 | <b>Fold:</b> Dihydrofolate reductase-like<br><b>Superfamily:</b> Dihydrofolate reductase-like<br><b>Family:</b> RibD C-terminal domain-like<br><b>PDB entry:</b> <a href="#">PDBe</a> <a href="#">RCSB</a> <a href="#">PDBj</a>                                                                                                                                                  |
| 50 | <a href="#">c2d5nB_</a> | Alignment | not modelled | 98.2 | 14 | <b>PDB header:</b> hydrolase, oxidoreductase<br><b>Chain:</b> B: <b>PDB Molecule:</b> riboflavin biosynthesis protein ribd;<br><b>PDBTitle:</b> crystal structure of a bifunctional deaminase and reductase2 involved in riboflavin biosynthesis<br><b>PDB Entry:</b> <a href="#">PDBe</a> <a href="#">RCSB</a> <a href="#">PDBj</a>                                             |
| 51 | <a href="#">d2azna1</a> | Alignment | not modelled | 98.4 | 15 | <b>Fold:</b> Dihydrofolate reductase-like<br><b>Superfamily:</b> Dihydrofolate reductase-like<br><b>Family:</b> RibD C-terminal domain-like<br><b>PDB entry:</b> <a href="#">PDBe</a> <a href="#">RCSB</a> <a href="#">PDBj</a>                                                                                                                                                  |
| 52 | <a href="#">c6p8cB_</a> | Alignment | not modelled | 98.4 | 14 | <b>PDB header:</b> oxidoreductase<br><b>Chain:</b> B: <b>PDB Molecule:</b> 2,5-diamino-6-ribosylamino-4(3h)-pyrimidinone 5'-phosphate<br><b>PDBTitle:</b> 2,5-diamino-6-(ribosylamino)-4(3h)-pyrimidinone 5'-phosphate reductase2 (mthred) from methanothermobacter thermoautotrophicus<br><b>PDB Entry:</b> <a href="#">PDBe</a> <a href="#">RCSB</a> <a href="#">PDBj</a>      |
| 53 | <a href="#">c3ky8B_</a> | Alignment | not modelled | 98.4 | 13 | <b>PDB header:</b> biosynthetic protein<br><b>Chain:</b> B: <b>PDB Molecule:</b> putative riboflavin biosynthesis protein;<br><b>PDBTitle:</b> crystal structure of putative riboflavin biosynthesis protein2 (yp_001092907.1) from shewanella sp. pv-4 at 2.12 a resolution<br><b>PDB Entry:</b> <a href="#">PDBe</a> <a href="#">RCSB</a> <a href="#">PDBj</a>                 |
| 54 | <a href="#">c4xt6A_</a> | Alignment | not modelled | 97.4 | 14 | <b>PDB header:</b> oxidoreductase<br><b>Chain:</b> A: <b>PDB Molecule:</b> rv2671;<br><b>PDBTitle:</b> crystal structure of rv2671 from mycobacterium tuberculosis in complex2 with the tetrahydropteridine ring of tetrahydrofolate (thf)<br><b>PDB Entry:</b> <a href="#">PDBe</a> <a href="#">RCSB</a> <a href="#">PDBj</a>                                                   |
| 55 | <a href="#">c4ha7B_</a> | Alignment | not modelled | 87.7 | 13 | <b>PDB header:</b> oxidoreductase<br><b>Chain:</b> B: <b>PDB Molecule:</b> 2,5-diamino-6-ribosylamino-4(3h)-pyrimidinone 5'-phosphate<br><b>PDBTitle:</b> structural insights into the reduction mechanism of saccharomyces2 cerevisia riboflavin biosynthesis reductase rib7<br><b>PDB Entry:</b> <a href="#">PDBe</a> <a href="#">RCSB</a> <a href="#">PDBj</a>                |
| 56 | <a href="#">c4cvkA_</a> | Alignment | not modelled | 82.9 | 14 | <b>PDB header:</b> ligase<br><b>Chain:</b> A: <b>PDB Molecule:</b> udp-n-acetylmuramoyl-tripeptide--d-alanyl-d-alanine ligase;<br><b>PDBTitle:</b> pamurf in complex with udp-murnac-tripeptide (mdap)<br><b>PDB Entry:</b> <a href="#">PDBe</a> <a href="#">RCSB</a> <a href="#">PDBj</a>                                                                                       |
| 57 | <a href="#">c7waeB_</a> | Alignment | not modelled | 81.5 | 28 | <b>PDB header:</b> ligase<br><b>Chain:</b> B: <b>PDB Molecule:</b> cyanophycin synthase;<br><b>PDBTitle:</b> trichodesmium erythraeum cyanophycin synthetase 1 (tecpha1) with2 atpgammas, 4x(beta-asp-arg), and aspartate<br><b>PDB Entry:</b> <a href="#">PDBe</a> <a href="#">RCSB</a> <a href="#">PDBj</a>                                                                    |
| 58 | <a href="#">c7lgjC_</a> | Alignment | not modelled | 69.2 | 28 | <b>PDB header:</b> ligase<br><b>Chain:</b> C: <b>PDB Molecule:</b> cyanophycin synthase;<br><b>PDBTitle:</b> cyanophycin synthetase 1 from synechocystis sp. utex2470 with adpcp2 and 8x(asp-arg)-nh2<br><b>PDB Entry:</b> <a href="#">PDBe</a> <a href="#">RCSB</a> <a href="#">PDBj</a>                                                                                        |
| 59 | <a href="#">c7sy9B_</a> | Alignment | not modelled | 65.6 | 14 | <b>PDB header:</b> ligase<br><b>Chain:</b> B: <b>PDB Molecule:</b> udp-n-acetylmuramoylalanine--d-glutamate ligase;<br><b>PDBTitle:</b> crystal structure of udp-n-acetylmuramoylalanine--d-glutamate ligase2 (murd) from pseudomonas aeruginosa pao1<br><b>PDB Entry:</b> <a href="#">PDBe</a> <a href="#">RCSB</a> <a href="#">PDBj</a>                                        |
| 60 | <a href="#">c6vr7A_</a> | Alignment | not modelled | 65.1 | 17 | <b>PDB header:</b> ligase<br><b>Chain:</b> A: <b>PDB Molecule:</b> mur ligase middle domain protein;<br><b>PDBTitle:</b> structure of a pseudomurein peptide ligase type c from methanothermus2 fervidus<br><b>PDB Entry:</b> <a href="#">PDBe</a> <a href="#">RCSB</a> <a href="#">PDBj</a>                                                                                     |
| 61 | <a href="#">c2xjaD_</a> | Alignment | not modelled | 62.2 | 23 | <b>PDB header:</b> ligase<br><b>Chain:</b> D: <b>PDB Molecule:</b> udp-n-acetylmuramoyl-l-alanyl-d-glutamate--2,6-<br><b>PDBTitle:</b> structure of mure from m.tuberculosis with dipeptide and adp<br><b>PDB Entry:</b> <a href="#">PDBe</a> <a href="#">RCSB</a> <a href="#">PDBj</a>                                                                                          |
| 62 | <a href="#">c1j6uA_</a> | Alignment | not modelled | 61.8 | 20 | <b>PDB header:</b> ligase<br><b>Chain:</b> A: <b>PDB Molecule:</b> udp-n-acetylmuramate-alanine ligase murc;<br><b>PDBTitle:</b> crystal structure of udp-n-acetylmuramate-alanine ligase murc (tm0231)2 from thermotoga maritima at 2.3 a resolution<br><b>PDB Entry:</b> <a href="#">PDBe</a> <a href="#">RCSB</a> <a href="#">PDBj</a>                                        |
| 63 | <a href="#">c7lgnB_</a> | Alignment | not modelled | 55.8 | 19 | <b>PDB header:</b> ligase<br><b>Chain:</b> B: <b>PDB Molecule:</b> cyanophycin synthase;<br><b>PDBTitle:</b> cyanophycin synthetase 1 from t. morbirosei<br><b>PDB Entry:</b> <a href="#">PDBe</a> <a href="#">RCSB</a> <a href="#">PDBj</a>                                                                                                                                     |
| 64 | <a href="#">c3zdrA_</a> | Alignment | not modelled | 55.2 | 12 | <b>PDB header:</b> oxidoreductase<br><b>Chain:</b> A: <b>PDB Molecule:</b> alcohol dehydrogenase domain of the bifunctional<br><b>PDBTitle:</b> structure of the alcohol dehydrogenase (adh) domain of a2 bifunctional adhe dehydrogenase from geobacillus3 thermoglucosidasius ncimb 11955<br><b>PDB Entry:</b> <a href="#">PDBe</a> <a href="#">RCSB</a> <a href="#">PDBj</a>  |
|    |                         |           |              |      |    | <b>PDB header:</b> oxidoreductase<br><b>Chain:</b> B: <b>PDB Molecule:</b> glycerol-1-phosphate dehydrogenase                                                                                                                                                                                                                                                                    |

|    |                         |           |              |      |    |                                                                                                                                                                                                                                                                                                                                       |
|----|-------------------------|-----------|--------------|------|----|---------------------------------------------------------------------------------------------------------------------------------------------------------------------------------------------------------------------------------------------------------------------------------------------------------------------------------------|
| 65 | <a href="#">c4rfIB_</a> | Alignment | not modelled | 50.6 | 19 | [nad(p)+];<br><b>PDBTitle:</b> crystal structure of g1pdh with nadph from methanocaldococcus2 jannaschii<br><b>PDB Entry:</b> <a href="#">PDBe</a> <a href="#">RCSB</a> <a href="#">PDBj</a>                                                                                                                                          |
| 66 | <a href="#">c4c13A_</a> | Alignment | not modelled | 50.0 | 15 | <b>PDB header:</b> ligase<br><b>Chain:</b> A: <b>PDB Molecule:</b> udp-n-acetylmuramoyl-l-alanyl-d-glutamate--l-lysine ligase;<br><b>PDBTitle:</b> x-ray crystal structure of staphylococcus aureus mure with udp-murnac-2 ala-glu-lys<br><b>PDB Entry:</b> <a href="#">PDBe</a> <a href="#">RCSB</a> <a href="#">PDBj</a>            |
| 67 | <a href="#">c1e8cB_</a> | Alignment | not modelled | 47.8 | 22 | <b>PDB header:</b> ligase<br><b>Chain:</b> B: <b>PDB Molecule:</b> udp-n-acetylmuramoylalanyl-d-glutamate--2,6-diaminopimelate<br><b>PDBTitle:</b> structure of mure the udp-n-acetylmuramyl tripeptide synthetase from2 e. coli<br><b>PDB Entry:</b> <a href="#">PDBe</a> <a href="#">RCSB</a> <a href="#">PDBj</a>                  |
| 68 | <a href="#">c7bvaB_</a> | Alignment | not modelled | 47.4 | 11 | <b>PDB header:</b> ligase<br><b>Chain:</b> B: <b>PDB Molecule:</b> udp-n-acetylmuramate--l-alanine ligase;<br><b>PDBTitle:</b> crystal structure of udp-n-acetylmuramic acid l-alanine ligase (murc)2 from mycobacterium bovis<br><b>PDB Entry:</b> <a href="#">PDBe</a> <a href="#">RCSB</a> <a href="#">PDBj</a>                    |
| 69 | <a href="#">d1gg4a1</a> | Alignment | not modelled | 45.8 | 15 | <b>Fold:</b> MurD-like peptide ligases, peptide-binding domain<br><b>Superfamily:</b> MurD-like peptide ligases, peptide-binding domain<br><b>Family:</b> MurCDEF C-terminal domain<br><b>PDB entry:</b> <a href="#">PDBe</a> <a href="#">RCSB</a> <a href="#">PDBj</a>                                                               |
| 70 | <a href="#">c7d27A_</a> | Alignment | not modelled | 42.7 | 31 | <b>PDB header:</b> ligase<br><b>Chain:</b> A: <b>PDB Molecule:</b> udp-n-acetylmuramoyl-l-alanyl-d-glutamate--2,6-<br><b>PDBTitle:</b> structure of udp-n-acetylmuramoyl-l-alanyl-d-glutamate--2, 6-2 diaminopimelate ligase<br><b>PDB Entry:</b> <a href="#">PDBe</a> <a href="#">RCSB</a> <a href="#">PDBj</a>                      |
| 71 | <a href="#">c1gqqa_</a> | Alignment | not modelled | 41.7 | 5  | <b>PDB header:</b> cell wall biosynthesis<br><b>Chain:</b> A: <b>PDB Molecule:</b> udp-n-acetylmuramate-l-alanine ligase;<br><b>PDBTitle:</b> murc - crystal structure of the apo-enzyme from haemophilus influenzae<br><b>PDB Entry:</b> <a href="#">PDBe</a> <a href="#">RCSB</a> <a href="#">PDBj</a>                              |
| 72 | <a href="#">c2f00A_</a> | Alignment | not modelled | 38.6 | 8  | <b>PDB header:</b> ligase<br><b>Chain:</b> A: <b>PDB Molecule:</b> udp-n-acetylmuramate--l-alanine ligase;<br><b>PDBTitle:</b> escherichia coli murc<br><b>PDB Entry:</b> <a href="#">PDBe</a> <a href="#">RCSB</a> <a href="#">PDBj</a>                                                                                              |
| 73 | <a href="#">c3uhjE_</a> | Alignment | not modelled | 34.8 | 18 | <b>PDB header:</b> oxidoreductase<br><b>Chain:</b> E: <b>PDB Molecule:</b> probable glycerol dehydrogenase;<br><b>PDBTitle:</b> crystal structure of a probable glycerol dehydrogenase from2 sinorhizobium meliloti 1021<br><b>PDB Entry:</b> <a href="#">PDBe</a> <a href="#">RCSB</a> <a href="#">PDBj</a>                          |
| 74 | <a href="#">c6csjD_</a> | Alignment | not modelled | 33.1 | 23 | <b>PDB header:</b> oxidoreductase<br><b>Chain:</b> D: <b>PDB Molecule:</b> glycerol dehydrogenase;<br><b>PDBTitle:</b> structure of a bacillus coagulans polyol dehydrogenase double mutant2 with an acquired d-lactate dehydrogenase activity<br><b>PDB Entry:</b> <a href="#">PDBe</a> <a href="#">RCSB</a> <a href="#">PDBj</a>    |
| 75 | <a href="#">c5fb3C_</a> | Alignment | not modelled | 31.9 | 12 | <b>PDB header:</b> oxidoreductase<br><b>Chain:</b> C: <b>PDB Molecule:</b> glycerol-1-phosphate dehydrogenase<br>[nad(p)+];<br><b>PDBTitle:</b> structure of glycerophosphate dehydrogenase in complex with nadph<br><b>PDB Entry:</b> <a href="#">PDBe</a> <a href="#">RCSB</a> <a href="#">PDBj</a>                                 |
| 76 | <a href="#">c1o5zA_</a> | Alignment | not modelled | 31.4 | 23 | <b>PDB header:</b> ligase<br><b>Chain:</b> A: <b>PDB Molecule:</b> folypolyglutamate synthase/dihydrofolate synthase;<br><b>PDBTitle:</b> crystal structure of folypolyglutamate synthase (tm0166) from2 thermotoga maritima at 2.10 a resolution<br><b>PDB Entry:</b> <a href="#">PDBe</a> <a href="#">RCSB</a> <a href="#">PDBj</a> |
| 77 | <a href="#">d2gc6a1</a> | Alignment | not modelled | 28.4 | 21 | <b>Fold:</b> MurD-like peptide ligases, peptide-binding domain<br><b>Superfamily:</b> MurD-like peptide ligases, peptide-binding domain<br><b>Family:</b> Folylpolyglutamate synthetase, C-terminal domain<br><b>PDB entry:</b> <a href="#">PDBe</a> <a href="#">RCSB</a> <a href="#">PDBj</a>                                        |
| 78 | <a href="#">c5zwoY_</a> | Alignment | not modelled | 28.3 | 27 | <b>PDB header:</b> splicing<br><b>Chain:</b> Y: <b>PDB Molecule:</b> pre-mrna-splicing factor cwc26;<br><b>PDBTitle:</b> cryo-em structure of the yeast b complex at average resolution of 3.92 angstrom<br><b>PDB Entry:</b> <a href="#">PDBe</a> <a href="#">RCSB</a> <a href="#">PDBj</a>                                          |
| 79 | <a href="#">d1o6da_</a> | Alignment | not modelled | 27.4 | 24 | <b>Fold:</b> alpha/beta knot<br><b>Superfamily:</b> alpha/beta knot<br><b>Family:</b> YbeA-like<br><b>PDB entry:</b> <a href="#">PDBe</a> <a href="#">RCSB</a> <a href="#">PDBj</a>                                                                                                                                                   |
| 80 | <a href="#">d1j6ua2</a> | Alignment | not modelled | 27.0 | 14 | <b>Fold:</b> MurD-like peptide ligases, peptide-binding domain<br><b>Superfamily:</b> MurD-like peptide ligases, peptide-binding domain<br><b>Family:</b> MurCDEF C-terminal domain<br><b>PDB entry:</b> <a href="#">PDBe</a> <a href="#">RCSB</a> <a href="#">PDBj</a>                                                               |
| 81 | <a href="#">c3ox4D_</a> | Alignment | not modelled | 26.8 | 18 | <b>PDB header:</b> oxidoreductase<br><b>Chain:</b> D: <b>PDB Molecule:</b> alcohol dehydrogenase 2;<br><b>PDBTitle:</b> structures of iron-dependent alcohol dehydrogenase 2 from zymomonas2 mobilis zm4 complexed with nad cofactor<br><b>PDB Entry:</b> <a href="#">PDBe</a> <a href="#">RCSB</a> <a href="#">PDBj</a>              |
| 82 | <a href="#">c1xahA_</a> | Alignment | not modelled | 25.1 | 15 | <b>PDB header:</b> lyase<br><b>Chain:</b> A: <b>PDB Molecule:</b> 3-dehydroquinate synthase;<br><b>PDBTitle:</b> crystal structure of staphylococcus aureus 3-dehydroquinate2 synthase (dhqs) in complex with zn2+ and nad+<br><b>PDB Entry:</b> <a href="#">PDBe</a> <a href="#">RCSB</a> <a href="#">PDBj</a>                       |
| 83 | <a href="#">c3hl0B_</a> | Alignment | not modelled | 24.5 | 16 | <b>PDB header:</b> oxidoreductase<br><b>Chain:</b> B: <b>PDB Molecule:</b> maleylacetate reductase;<br><b>PDBTitle:</b> crystal structure of maleylacetate reductase from agrobacterium2 tumefaciens<br><b>PDB Entry:</b> <a href="#">PDBe</a> <a href="#">RCSB</a> <a href="#">PDBj</a>                                              |
| 84 | <a href="#">c3uagA_</a> | Alignment | not modelled | 23.4 | 20 | <b>PDB header:</b> ligase<br><b>Chain:</b> A: <b>PDB Molecule:</b> protein (udp-n-acetylmuramoyl-l-alanine:d-glutamate<br><b>PDBTitle:</b> udp-n-acetylmuramoyl-l-alanine:d-glutamate ligase<br><b>PDB Entry:</b> <a href="#">PDBe</a> <a href="#">RCSB</a> <a href="#">PDBj</a>                                                      |
| 85 | <a href="#">c2dzaA_</a> | Alignment | not modelled | 23.0 | 18 | <b>PDB header:</b> transferase<br><b>Chain:</b> A: <b>PDB Molecule:</b> dihydropteroate synthase;<br><b>PDBTitle:</b> crystal structure of dihydropteroate synthase from thermus2 thermophilus hb8 in complex with 4-aminobenzoate                                                                                                    |



|    |                         |           |              |      |    |                                                                                                                                                                                                                                                                                                                                                                                                           |
|----|-------------------------|-----------|--------------|------|----|-----------------------------------------------------------------------------------------------------------------------------------------------------------------------------------------------------------------------------------------------------------------------------------------------------------------------------------------------------------------------------------------------------------|
|    |                         |           |              |      |    | <b>PDB Entry:</b> <a href="#">PDBe</a> <a href="#">RCSB</a> <a href="#">PDBj</a><br><b>PDB header:</b> oxidoreductase<br><b>Chain:</b> B: <b>PDB Molecule:</b> l-lactate dehydrogenase;<br><b>PDBTitle:</b> crystal structure of l-lactate dehydrogenase from bacillus2 selenitireducens mls10, nysgrc target 029814.<br><b>PDB Entry:</b> <a href="#">PDBe</a> <a href="#">RCSB</a> <a href="#">PDBj</a> |
| 86 | <a href="#">c4m1qB_</a> | Alignment | not modelled | 22.1 | 15 | <b>PDB header:</b> ligase<br><b>Chain:</b> A: <b>PDB Molecule:</b> udp-n-acetylmuramoylalanyl-d-glutamyl-2,6-diaminopimelate-<br><b>PDBTitle:</b> crystal structure of escherichia coli udpmurnac-tripeptide d-alanyl-d-2 alanine-adding enzyme (murf) at 2.3 angstrom resolution<br><b>PDB Entry:</b> <a href="#">PDBe</a> <a href="#">RCSB</a> <a href="#">PDBj</a>                                     |
| 87 | <a href="#">c1gg4A_</a> | Alignment | not modelled | 22.0 | 16 | <b>PDB header:</b> hydrolase<br><b>Chain:</b> A: <b>PDB Molecule:</b> lysin;<br><b>PDBTitle:</b> crystal structure of a wild type endolysin lysime-ef1<br><b>PDB Entry:</b> <a href="#">PDBe</a> <a href="#">RCSB</a> <a href="#">PDBj</a>                                                                                                                                                                |
| 88 | <a href="#">c6istA_</a> | Alignment | not modelled | 21.1 | 26 | <b>PDB header:</b> oxidoreductase<br><b>Chain:</b> A: <b>PDB Molecule:</b> glycerol dehydrogenase;<br><b>PDBTitle:</b> crystal structure of glycerol dehydrogenase from schizosaccharomyces2 pombe<br><b>PDB Entry:</b> <a href="#">PDBe</a> <a href="#">RCSB</a> <a href="#">PDBj</a>                                                                                                                    |
| 89 | <a href="#">c1ta9A_</a> | Alignment | not modelled | 21.1 | 15 | <b>PDB header:</b> lyase<br><b>Chain:</b> B: <b>PDB Molecule:</b> 3-dehydroquinase synthase;<br><b>PDBTitle:</b> desmethyl-4-deoxygadusol synthase from anabaena variabilis (ava_3858)2 with nad+ and zn2+ bound<br><b>PDB Entry:</b> <a href="#">PDBe</a> <a href="#">RCSB</a> <a href="#">PDBj</a>                                                                                                      |
| 90 | <a href="#">c5tpR_</a>  | Alignment | not modelled | 20.1 | 12 | <b>PDB header:</b> rna binding protein<br><b>Chain:</b> J: <b>PDB Molecule:</b> m-phase phosphoprotein 6 homolog;<br><b>PDBTitle:</b> crystal structure of the mpp6 exosome complex<br><b>PDB Entry:</b> <a href="#">PDBe</a> <a href="#">RCSB</a> <a href="#">PDBj</a>                                                                                                                                   |
| 91 | <a href="#">c5okzJ_</a> | Alignment | not modelled | 19.7 | 50 | <b>PDB header:</b> rna binding protein<br><b>Chain:</b> A: <b>PDB Molecule:</b> trna (guanine(9)-adenine(9)-n1)-methyltransferase;<br><b>PDBTitle:</b> crystal structure of dual specific trm10 construct from thermococcus2 kodakaraensis.<br><b>PDB Entry:</b> <a href="#">PDBe</a> <a href="#">RCSB</a> <a href="#">PDBj</a>                                                                           |
| 92 | <a href="#">c6emvA_</a> | Alignment | not modelled | 19.1 | 20 | <b>Fold:</b> Dehydroquinase synthase-like<br><b>Superfamily:</b> Dehydroquinase synthase-like<br><b>Family:</b> Iron-containing alcohol dehydrogenase<br><b>PDB entry:</b> <a href="#">PDBe</a> <a href="#">RCSB</a> <a href="#">PDBj</a>                                                                                                                                                                 |
| 93 | <a href="#">d1jq5a_</a> | Alignment | not modelled | 19.0 | 20 | <b>PDB header:</b> oxidoreductase<br><b>Chain:</b> B: <b>PDB Molecule:</b> l-lactate dehydrogenase 1;<br><b>PDBTitle:</b> crystal structure of l-lactate dehydrogenase from bacillus cereus atcc2 14579 complexed with calcium, nysgrc target 029452<br><b>PDB Entry:</b> <a href="#">PDBe</a> <a href="#">RCSB</a> <a href="#">PDBj</a>                                                                  |
| 94 | <a href="#">c4ln1B_</a> | Alignment | not modelled | 18.6 | 18 | <b>PDB header:</b> cell cycle<br><b>Chain:</b> F: <b>PDB Molecule:</b> tubulin tyrosine ligase, ttl;<br><b>PDBTitle:</b> crystal structure of tubulin-stathmin-ttl-apo complex<br><b>PDB Entry:</b> <a href="#">PDBe</a> <a href="#">RCSB</a> <a href="#">PDBj</a>                                                                                                                                        |
| 95 | <a href="#">c4ijjF_</a> | Alignment | not modelled | 18.5 | 31 | <b>Fold:</b> Dehydroquinase synthase-like<br><b>Superfamily:</b> Dehydroquinase synthase-like<br><b>Family:</b> Iron-containing alcohol dehydrogenase<br><b>PDB entry:</b> <a href="#">PDBe</a> <a href="#">RCSB</a> <a href="#">PDBj</a>                                                                                                                                                                 |
| 96 | <a href="#">d1vlja_</a> | Alignment | not modelled | 16.5 | 19 | <b>PDB header:</b> ligase<br><b>Chain:</b> A: <b>PDB Molecule:</b> udp-n-acetylmuramoylalanine--d-glutamate ligase;<br><b>PDBTitle:</b> crystal structure of udp-n-acetylmuramoylalanine-d-glutamate ligase2 from acinetobacter baumannii ab5075-uw<br><b>PDB Entry:</b> <a href="#">PDBe</a> <a href="#">RCSB</a> <a href="#">PDBj</a>                                                                   |
| 97 | <a href="#">c7sirA_</a> | Alignment | not modelled | 16.4 | 15 | <b>PDB header:</b> oxidoreductase(choh(d)-nad(a))<br><b>Chain:</b> A: <b>PDB Molecule:</b> apo-l-lactate dehydrogenase;<br><b>PDBTitle:</b> structure determination and refinement of bacillus2 stearothermophilus lactate dehydrogenase<br><b>PDB Entry:</b> <a href="#">PDBe</a> <a href="#">RCSB</a> <a href="#">PDBj</a>                                                                              |
| 98 | <a href="#">c1ldbA_</a> | Alignment | not modelled | 16.4 | 19 | <b>Fold:</b> alpha/beta knot<br><b>Superfamily:</b> alpha/beta knot<br><b>Family:</b> YbeA-like<br><b>PDB entry:</b> <a href="#">PDBe</a> <a href="#">RCSB</a> <a href="#">PDBj</a>                                                                                                                                                                                                                       |
| 99 | <a href="#">d1ns5a_</a> | Alignment | not modelled | 16.1 | 43 |                                                                                                                                                                                                                                                                                                                                                                                                           |
